1 **PLOS ONE**

2 **Evaluation of waste paper for cultivation of oyster mushroom (*Pleurotus ostreatus*) with some added**  
3 **supplementary materials**

4 Teklemichael Tesfay<sup>1</sup>, Tesfay Godifey<sup>2a</sup>, Roman Mesfin<sup>2</sup> and Girmay Kalayu<sup>2\*</sup>

5 <sup>1,2</sup>Current address: Department of Biology, Aksum University, Tigray, Ethiopia

6 <sup>a</sup>Current address: Department of Biology, Raya University, Tigray, Ethiopia

7 \*Corresponding author.

8 Email: [Gkalayu@gmail.com](mailto:Gkalayu@gmail.com); ORCID: <http://orcid.org/0000-0001-7021-0386>

9 **Authors' contributions**

10 Teklemichael Tesfay designed and performed the experiments and wrote the manuscript. Tesfay Godifey & Roman  
11 Mesfin assisted with the experiments, provided constructive criticism, Girmay Kalayu edited and reviewed the  
12 manuscript. All authors discussed the results and contributed to the final manuscript.

29 **Abstract:** Mushroom cultivation is an economically feasible bio-technological process for conversion of various  
30 lignocellulosic wastes. This study was conducted at Aksum University with the aim of evaluating the suitability of waste  
31 paper supplemented with corn stalk and wheat bran for Oyster mushroom cultivation. Spawn were prepared in  
32 Microbiology laboratory and inoculated into the prepared substrates. Waste paper supplemented with corn stalk and  
33 wheat bran with 0%, 25% and 50% were tested for their productivity and biological efficiency (BE) for cultivation of  
34 *P.ostreatus* mushroom. Data were analyzed using SPSS version 20. Higher ( $26.20 \pm 19.36$ ) mean weight, pileus diameter  
35 ( $7.90 \pm 2.66$ cm), total yield ( $646.4 \pm 273.1$ gm) and BE ( $64.64 \pm 273$  %) were obtained from waste paper (50%) +cornstalk  
36 (25%) +wheat bran (25%). However, Lower ( $17.92 \pm 81.95$ %) BE were obtained from waste paper (100%). Moreover, the  
37 highest ( $3.88 \pm 0.32$  cm) mean stalk length were obtained from waste paper (50%) + cornstalk (50). This study revealed  
38 that waste paper supplemented with corn stalk and wheat bran results in high BE and total yield. Thus, appears to be a  
39 promising alternative for the cultivation of oyster mushroom. Yet, waste paper without supplement poorly supports the  
40 growth of *P.ostreatus* mushroom.

41 **Key words:** Biological efficiency, Oyster Mushroom, *Pleurotus ostreatus*, spawn, waste paper

## 42 **1. Introduction**

43 Mushrooms are fleshy, spore-bearing, multicellular fungi. They fall under the phyla Basidiomycota. Mushrooms are a  
44 good source of protein, vitamins and minerals and are known to have a broad range of uses both as food and medicine.  
45 Oyster mushroom, *Pleurotus ostreatus*, has been widely cultivated and commercialized next to *Agaricus bisporus*.  
46 Several studies have reported that *P. ostreatus* contains approximately 100 bioactive compounds, which is a potential  
47 source of dietary fiber. Besides, they are rich in protein, lipids, carbohydrates, vitamin and minerals content but low in  
48 calories and fat content (Deepalakshmi and Mirunalini, 2014). They are the easiest and least expensive commercial  
49 mushrooms to grow because they are well known for conversion of crop residues to food protein and are considered as  
50 potential source of income, alternative food production, provision of employment, and for recycling of agricultural wastes  
51 (Banik and Nandi, 2004).

52 Oyster mushroom has abilities to grow at a wide range of temperatures utilizing various lignocelluloses (Sa' nchez,  
53 2010). Oyster mushrooms produce extensive enzymes and utilize complex organic compounds which occur as  
54 agricultural wastes and industrial by-products (Baysal *et al.*, 2003). Thus, most organic matters containing cellulose,  
55 hemicellulose and lignin can be used as mushroom substrate i.e. rice and wheat straw, cottonseed hulls, corncob, paddy  
56 straw sugarcane baggase, sawdust, waste paper, and leaves (Sharma *et al.*, 2013). However, an ideal substrate should  
57 contain nitrogen (supplement) and carbohydrates for rapid mushroom growth (Khare *et al.*, 2010). Oyster mushroom

58 cultivation can play an important role in managing organic wastes, such as Waste papers and cornstalks, whose disposal  
59 has become a problem. Therefore, the current study was aimed at evaluating waste paper supplemented with cornstalk,  
60 and wheat bran as substrates for the cultivation of mushroom.

## 61 2. METHODOLOGY

### 62 2.1. DESCRIPTION OF THE STUDY AREA

63 The study was conducted in Microbiology laboratory, Department of Biology, Aksum University. Aksum University is  
64 found in Aksum town, 1024 km to north of Addis Ababa, Ethiopia.

### 65 2.2 SPAWN PREPARATION

66 For spawn preparation, 15 kg of sorghum was soaked in water overnight. The excess water was drained off and (5%)  
67 wheat bran and (2%) gypsum were added. The ingredients were thoroughly mixed and moisture was adjusted to 55- 60%.  
68 Then the mixture was distributed equally in to 250 ml plastic bags, at the rate of 250 g seed per plastic bag and  
69 autoclaved, at 121 °C for 30 min. After cooling, each bottle was inoculated with fungal culture. When the mixture was  
70 totally invaded by mycelium, after 15 days of incubation at 25 °C, the spawn was ready to be used for the inoculation of  
71 the solid substrate (Fan *et al.*, 2000).

### 72 2.3 Oyster Mushroom Cultivation Techniques

73 Oyster mushroom cultivation was done according to (Randive, 2012). The compositions of substrates used as a treatment  
74 groups for the cultivation of oyster mushroom were:

| S/NO. | Treatment groups                                |
|-------|-------------------------------------------------|
| 1.    | Waste paper (50%) + wheat bran (50%)            |
| 2     | Waste paper 75% + wheat bran 25%                |
| 3     | Waste paper 100%                                |
| 4     | Waste paper 50% + cornstalk 50%                 |
| 5     | Waste paper 75%+ corn stalk 25%                 |
| 6     | Waste paper 50%+corn stalk 25%+ wheat bran 25%. |

75 Initially, waste paper and cornstalk were chopped into small pieces (3–5 cm long). The substrates were soaked in water  
76 for 24 hours to moisten it thoroughly and pasteurized using clean steel drums. First the water was heated at 60°C. Then  
77 the substrate was added and allowed to remain in the water for 30 minutes. Finally, once pasteurized, it was stalked on the  
78 steep cemented floor so as to remove the excessive moisture from the substrates to get 65-75% moisture level. Holes  
79 were prepared for aeration in the 500ml plastic bag. Eventually the spawn prepared was mixed with substrate and placed

80 in dark room in 500 ml plastic bags. After the spawn run, the bags of mycelial colonized substrates were transferred to the  
81 cropping room, a room with a limited light, and watered periodically.

## 82 **2.4. Harvesting and yield measures**

83 Mature mushrooms were picked by clean hand without harming the substrate when they started to wrinkle-ripe. This was  
84 done for three subsequent flushes. Following the method of Iqbal *et al.* (2005), the yield parameters were recorded with  
85 respect to time (days) taken for completion of spawn running, time taken for the first appearance of pinhead formation,  
86 time taken for maturity of fruit bodies, number of flushes, and yield of flushes on the treatment substrates (Total weight  
87 of all the fruiting bodies harvested from all the three pickings were measured and considered as total yield of mushroom).  
88 The pileus diameter and the stipe length were measured with graduated transparent ruler. Mature mushrooms were  
89 weighed with analytical balance to determine the biological efficiency (BE) of mushrooms produced from substrates. The  
90 average Biological efficiency (BE) of harvests was computed as per described by Peng *et al.* (2000).

$$91 \quad \text{BE} = \frac{\text{Weight of fresh mushroom harvested per bag} \times 100\%}{\text{Weight of dry substrate per bag before inoculation}}$$

92 **Days Required for Completing Mycelium Running:** Time taken Days required from inoculation to completion of  
93 mycelium running was measured.

94 **Primordia Initiation (days):** Time required from stimulation to primordia initiation (days) were recorded.

95 **Number of total primordial:** Total numbers of primordial were counted from each plastic bag.

96 **Time from Primordial Initiation to Harvest (Maturity) (days):** Time required from primordial initiation to harvest  
97 (days) were recorded.

98 **Number of flushes:** The numbers of flushes were counted in each plastic bag

99 **Average Weight of Individual Fruiting Body/plastic bag:** Average weight of individual fruiting body was calculated  
100 by dividing the total weight of fruiting body per plastic bag by the total number of fruiting body per plastic bag. i.e.

$$101 \quad \text{Weight} = \frac{\text{Total weight of fruiting body per plastic bag}}{\text{Total number of fruiting body}}$$

102 **Average Number of Effective Fruiting Body/Plastic bag:** Number of very well-developed fruiting body was recorded.  
103 Tiny fruiting bodies were discarded from counting.

104 **Pileus thickness (cm):** of the three randomly selected fruiting bodies of fresh mushroom pileus thickness was measured  
105 using a string.

106 **Mushroom pileus diameter:** The mushroom pileus diameter was taken from one end of the pileus to the other passing  
107 through the centre of the pileus and measured in millimeters (mm). This was done using a string which was placed along

108 a ruler to get the diameter. The pileus diameter was obtained on 3 randomly picked mushrooms, from the harvest and then  
 109 the average pileus diameter was calculated for a given harvest.  
 110 **Mushroom stipe length:** Stipe length was taken on the three mushrooms chosen to take the pileus diameter, using a  
 111 string. The length was measured by placing the string from one end where it was attached to the substrate to the point  
 112 where the gills on the pileus start on the stipe. The string was placed along a ruler to get the length in millimeters (mm).  
 113 **Yield of mushroom=** Total weight of all the fruiting bodies harvested from all the three pickings were measured as total  
 114 yield of mushroom.  
 115 Five replicas of each growing trial were performed. The data on spawn running was recorded after complete colonization  
 116 of substrate and pin head and fruit body formation were observed.

### 117 3. DATA COLLECTION AND DATA ANALYSIS

118 Data on mycelium colonization period, pin head formation, stalk length, BE, step length, pileus diameter were recorded  
 119 and analyzed using SPSS. Analysis of variance (ANOVA) was used to indicate significant mean differences at 95%  
 120 confidence interval.

### 121 4. RESULT

122 The number of days taken for complete mycelial growth differs significantly among the treatments. In the current study,  
 123 the fastest mycelia extension was observed in treatment one (15 days), treatment three (15 days), and treatment five (15  
 124 days) (**Table 1**). Treatment 2 and Treatment 4 took the maximum numbers of days (21 and 17) respectively.

125 **Table 1:** The effect of substrates on mycelium colonization period (days)

| Substrate                     | Mean $\pm$ S.D            |                           |                           | 95%                                   |                            |
|-------------------------------|---------------------------|---------------------------|---------------------------|---------------------------------------|----------------------------|
|                               | Flush1                    | Flush2                    | Flush3                    | Confidence for<br>the Overall<br>mean | Over all<br>mean $\pm$ S.D |
| WP (50%) + CS (50%)           | 15 <sup>a</sup>           | 15 <sup>a</sup>           | 15 <sup>a</sup>           | 15,15                                 | 15 <sup>a</sup>            |
| WP (75%) + CS (25%)           | 21 $\pm$ 1.6 <sup>b</sup> | 21 $\pm$ 1.6 <sup>b</sup> | 21 $\pm$ 1.6 <sup>b</sup> | 20.11,21.88                           | 21 $\pm$ 1.6 <sup>b</sup>  |
| WP (50%) + CS (25%) +WB (25%) | 15 <sup>a</sup>           | 15 <sup>a</sup>           | 15 <sup>a</sup>           | 15,15                                 | 15 <sup>a</sup>            |
| WP 100%                       | 17 <sup>a</sup>           | 17 <sup>a</sup>           | 17 <sup>a</sup>           | 17,17                                 | 17 <sup>ac</sup>           |
| WP (75%) + WB (25%)           | 15 <sup>a</sup>           | 15 <sup>a</sup>           | 15 <sup>a</sup>           | 15,15                                 | 15 <sup>a</sup>            |
| Cotton husk (Control) :T6     | 15 <sup>a</sup>           | 15 <sup>a</sup>           | 15 <sup>a</sup>           | 15,15                                 | 15 <sup>a</sup>            |

126 **Means followed by different superscript letters within a row and columns are significantly different ( $p < 0.05$  using**

127 **Tukes multiple comparisons method), WP= waste paper, CS=Corn stalk, WB= Wheat barn**

128 Table 2 shows that the mean pin head formation of some of the treatments varies significantly ( $P > 0.05$ ). Moreover, there  
 129 is variation in pin head formation between flushes of each treatment. Time taken for initial appearance of pinhead after  
 130 spawning of the substrate were  $9.46 \pm 0.8$  and  $11.60 \pm 3.24$  days for treatment group three and five respectively. Thus,  
 131 treatment three and five has shown a better substrate in case of pin-head formation.

132 **Table 2:** The effect of substrates on pin head formation

| Substrate        | mean $\pm$ SD and 95% CI of Pin for each flush |                    |                       | 95% CI for    | Over all mean      |
|------------------|------------------------------------------------|--------------------|-----------------------|---------------|--------------------|
|                  | flush 1                                        | flush 2            | flush 3               | the Overall   | Mean $\pm$ SD      |
| WP (50%) + CS    | $13 \pm 1.22^a$                                | $18.2 \pm 1.30^b$  | $16.2 \pm 1.09^{bc}$  | 14.42, 17.74  | $15.8 \pm 2.48^a$  |
| (50%)            | 11.47 , 14.12                                  | 16.58 , 19.82      | 14.84 , 17.56         |               |                    |
| WP (75%) + CS    | $12.8 \pm 0.84^a$                              | $15.60 \pm 2.30^a$ | $17.20 \pm 2.16^a$    | 13.77, 16.62  | $15.20 \pm 2.56^a$ |
| (25%)            | 11.76 , 13.84                                  | 12.74 , 18.46      | 14.50 , 19.89         |               |                    |
| WP (50%) + CS    | $5.80 \pm 1.30^a$                              | $10.80 \pm 0.86^b$ | $11.80 \pm 1.64^{bc}$ | 7.74, 11.19   | $9.46 \pm 0.80^b$  |
| (25%) + WB (25%) | 4.18 , 7.42                                    | 8.41, 13.18        | 9.76 , 13.84          |               |                    |
| WP 100%          | $19 \pm 2.34^a$                                | $16.20 \pm 5.67^a$ | $14.40 \pm 3.20^a$    | 14.21 , 18.85 | $16.53 \pm 4.18^a$ |
|                  | 16.08 , 21.91                                  | 9.15 , 23.24       | 10.41 , 18.38         |               |                    |
| WP (75%) + WB    | $14.60 \pm 2.79^a$                             | $9.80 \pm 3.03^b$  | $10.40 \pm 1.67^{ac}$ | 9.80, 13.39   | $11.60 \pm 3.24^c$ |
| (25%)            | 11.13 , 18.06                                  | 6.03, 13.56        | 8.32 , 12.47          |               |                    |
| Control          | 8                                              | 10                 | 9                     | 6.51 , 11.48  | $9.0 \pm 1.00^d$   |

133 **Means followed by different superscript letters within a row and columns are significantly different ( $p < 0.05$  using**

134 **Tukes multiple comparisons method), WP= waste paper, CS=Corn stalk, WB= Wheat barn**

135 Table 3 indicates mean  $\pm$ SD for each flush and the overall maturity (days) of Oyster mushroom. Maturity were not  
 136 significantly different ( $p > 0.05$ ) among the flush of each treatment while among the treatments, treatment four (Waste  
 137 paper 100%) were significantly ( $p < 0.05$ ) different. Considering the minimum number of days taken for maturity of  
 138 fruiting bodies, treatment one (3.4, 3.6 and 3.4 days) appears to be the best substrate followed by treatment three ( 4.2, 3.6  
 139 and 3.2 days) (**Table 3**). Maximum time period (4.4, 4.4, 4 days) was required for the maturity of fruiting bodies in case  
 140 of treatment four (waste paper (100%). Besides maturity between treatments were not significantly ( $p > 0.05$ ) different.  
 141 The mean maturity of the different treatments ranges from  $3.47 \pm 0.52$  (Treatment 1) to  $4.27 \pm 0.88$  (Treatment 4).  
 142 However, it took less days for maturation compared to the control group.

143 **Table 3:** Period of pinning-to-maturation of mushrooms in substrates (Days)

| Substrate                        | mean $\pm$ SD and 95% CI of Maturity for each flush |                                             |                                                 | 95% CI for the | Over all mean                |
|----------------------------------|-----------------------------------------------------|---------------------------------------------|-------------------------------------------------|----------------|------------------------------|
|                                  | flush 1                                             | flush 2                                     | flush 3                                         | Overall mean   | Mean $\pm$ SD                |
| WP (50%) + CS (50%)              | 3.40 $\pm$ 0.55 <sup>a</sup><br>2.72 , 4.08         | 3.60 $\pm$ 0.55 <sup>a</sup><br>2.92 , 4.28 | 3.40 $\pm$ 0.548 <sup>a</sup><br>2.72 , 4.08    | 3.18 , 3.75    | 3.47 $\pm$ 0.52 <sup>a</sup> |
| WP (75%) + CS (25%)              | 3.60 $\pm$ 0.55 <sup>a</sup><br>2.92 , 4.28         | 3.80 $\pm$ 0.45 <sup>a</sup><br>3.24 , 4.36 | 3.80 $\pm$ 0.45 <sup>a</sup><br>3.24 , 4.36     | 3.48 , 3.99    | 3.73 $\pm$ 0.46 <sup>a</sup> |
| WP (50%) + CS (25%)<br>+WB (25%) | 4.20 $\pm$ 0.84 <sup>a</sup><br>3.16 , 5.24         | 3.60 $\pm$ 0.55 <sup>a</sup><br>2.92 , 4.28 | 3.20 $\pm$ 0.45 <sup>a</sup><br>2.64 , 3.76     | 3.27 , 4.07    | 3.67 $\pm$ 0.72 <sup>a</sup> |
| WP 100%                          | 4.40 $\pm$ 0.89 <sup>a</sup><br>3.29 , 5.51         | 4.40 $\pm$ 0.89 <sup>a</sup><br>3.29 , 5.51 | 4.00 $\pm$ 1.00 <sup>a</sup><br>2.76 $\pm$ 5.24 | 3.78 , 4.76    | 4.27 $\pm$ 0.88 <sup>b</sup> |
| WP (75%) + WB (25%)              | 4.00 $\pm$ 0.71 <sup>a</sup><br>3.12 , 4.88         | 3.60 $\pm$ 0.55 <sup>a</sup><br>2.92 , 4.28 | 3.60 $\pm$ 0.55 <sup>a</sup><br>2.92 , 4.28     | 3.40 , 4.76    | 3.73 $\pm$ 0.59 <sup>a</sup> |
| <b>Control</b>                   | 4 <sup>a</sup>                                      | 4 <sup>a</sup>                              | 6 <sup>a</sup>                                  | 1.34 , 4.06    | 4.53 $\pm$ 0.74 <sup>a</sup> |

144 **Means followed by different superscript letters within a row and columns are significantly different ( $p < 0.05$  using**  
 145 **Tukes multiple comparisons method), WP= waste paper, CS=Corn stalk, WB= Wheat barn**

146 Table 4 indicates that higher mean stalk length were measured in treatment one (3.88 $\pm$ 0.32 cm) followed by treatment  
 147 three (3.62 $\pm$ 0.36 cm). However, no significant difference was observed in terms of stalk length between the different  
 148 substrates and the control. But, a decreasing pattern was observed in terms of stalk length of flush in each treatment.

149 **Table 4:** The effect of substrate on stalk length (cm)

| Substrate                        | mean $\pm$ SD and 95% CI of stalk length for each flush |                                            |                                             | 95% CI for the Overall | Over all mean                |
|----------------------------------|---------------------------------------------------------|--------------------------------------------|---------------------------------------------|------------------------|------------------------------|
|                                  | flush 1                                                 | flush 2                                    | flush 3                                     | mean                   | Mean $\pm$ SD                |
| WP (50%) + CS (50%)              | 5.32 $\pm$ 0.17 <sup>a</sup><br>4.84, 5.80              | 3.72 $\pm$ 0.29 <sup>b</sup><br>2.89, 4.54 | 2.60 $\pm$ 0.14 <sup>c</sup><br>2.22, 2.98  | 3.19, 4.56             | 3.88 $\pm$ 0.32 <sup>d</sup> |
| WP (75%) + CS (25%)              | 4.40 $\pm$ 0.69 <sup>a</sup><br>2.47, 6.33              | 3.72 $\pm$ 0.48 <sup>a</sup><br>2.38, 5.05 | 2.44 $\pm$ 0.59 <sup>a</sup><br>0.77, 4.10  | 2.69, 4.35             | 3.52 $\pm$ 0.38 <sup>d</sup> |
| WP (50%) + CS (25%)<br>+WB (25%) | 4.98 $\pm$ 0.46 <sup>a</sup><br>3.68, 6.27              | 3.12 $\pm$ 0.41 <sup>b</sup><br>1.97, 4.26 | 2.76 $\pm$ 0.51 <sup>bc</sup><br>1.33, 4.18 | 2.85, 4.39             | 3.62 $\pm$ 0.36 <sup>d</sup> |

|                     |                          |                        |                         |            |                        |
|---------------------|--------------------------|------------------------|-------------------------|------------|------------------------|
| WP 100%             | 3.60 ± 0.28 <sup>a</sup> | 3.16±0.21 <sup>a</sup> | 2.26±0.19 <sup>ab</sup> | 2.59, 3.42 | 3.01±0.19 <sup>d</sup> |
|                     | 2.80,4.39                | 2.60,3.72              | 1.72, 2.79              |            |                        |
| WP (75%) + WB (25%) | 4.12±0.38 <sup>a</sup>   | 3.30±0.44 <sup>a</sup> | 3.32±0.55 <sup>a</sup>  | 3.00, 4.15 | 3.58±0.26 <sup>d</sup> |
|                     | 3.05,5.18                | 2.06, 4.53             | 1.78,4.85               |            |                        |
| Control             | 4.62 <sup>a</sup>        | 3.64 <sup>a</sup>      | 3.00 <sup>a</sup>       | 1.73, 5.78 | 3.75±0.47 <sup>d</sup> |

150 Means followed by different superscript letters within a row and columns are significantly different ( $p < 0.05$  using  
 151 Tukey's multiple comparisons method), WP= waste paper, CS=Corn stalk, WB= Wheat barn

152 Table 5 shows that the mean ±SD of each flush and the overall mean of pileus diameter. The highest ( $7.90 \pm 2.66$  cm) and  
 153 the lowest ( $5.40 \pm 1.57$ cm) mean pileus diameter were noted on treatment three and five respectively. Significant  
 154 difference was observed between treatments 3 and 4. Besides, pileus diameter among flushes were not significantly  
 155 ( $p < 0.05$ ) different except in the second and third flushes of treatments two and three (Table 5).

156 **Table 5:** The effect of substrates on Pileus diameter (cm)

| Substrate                     | mean ±SD and 95% CI of Pileus diameter for each flush |                                        |                                         | 95% CI for the Overall mean            | Over all mean Mean ± SD  |
|-------------------------------|-------------------------------------------------------|----------------------------------------|-----------------------------------------|----------------------------------------|--------------------------|
|                               | flush 1                                               | flush 2                                | flush 3                                 |                                        |                          |
|                               | WP (50%) + CS (50%)                                   | 7.30±0.42 <sup>a</sup><br>6.77, 7.83   | 7.04 ± 0.74 <sup>a</sup><br>6.12 , 7.96 | 6.32 ±1.04 <sup>a</sup><br>5.02 , 7.62 | 6.42 , 7.35              |
| WP (75%) + CS (25%)           | 9.08 ±2.29 <sup>a</sup><br>6.24, 11,92                | 7.26 ± 1.82 <sup>a</sup><br>5.00, 9.51 | 5.24 ±1.41 <sup>b</sup><br>3.49 , 6.98  | 5.87, 8.51                             | 7.19±2.37 <sup>a</sup>   |
| WP (50%) + CS (25%) +WB (25%) | 10.58±2.40 <sup>a</sup><br>7.40 , 13.36               | 7.16±0.76 <sup>a</sup><br>6.22, 8.09   | 6.16 ±0.76 <sup>b</sup><br>3.02, 9.30   | 6.42, 9.37                             | 7.90 ±2.66 <sup>ac</sup> |
| WP 100%                       | 6.08 ±0.95 <sup>a</sup><br>4.89, 7.26                 | 6.34 ±0.97 <sup>a</sup><br>5.12 , 7.55 | 5.12 ±0.26 <sup>a</sup><br>4.79 ,5.44   | 5.34 , 6.35                            | 5.85 ±0.92 <sup>ab</sup> |
| WP (75%) + WB (25%)           | 6.28 ±1.19 <sup>a</sup><br>4.80 , 7.76                | 5.50 ±1.98 <sup>a</sup><br>3.00 , 7.96 | 4.42 ±1.09 <sup>a</sup><br>3.06, 5.77   | 4.53 , 6.27                            | 5.40 ±1.57 <sup>a</sup>  |
| Control                       | 6.30 <sup>a</sup>                                     | 6.30 <sup>a</sup>                      | 9.10 <sup>a</sup>                       | 3.22 , 11, 25                          | 7.23 ±1.61 <sup>a</sup>  |



157 **Means followed by different superscript letters within a row and columns are significantly different ( $p < 0.05$  using**  
 158 **Tukes multiple comparisons method), WP= waste paper, CS=Corn stalk, WB= Wheat barn**  
 159 Table 6 indicates the effect of substrate on mushroom Weight (gm). Of the 1<sup>st</sup> flush generation, the maximum ( $34.08 \pm$   
 160  $45.69$ gm) and minimum ( $6.34 \pm 1.44$  gm) mean weight gm) were recorded on treatment two and one respectively. Of the  
 161 2<sup>nd</sup> flush generation, the highest mean weight ( $33.76 \pm 22.47$ ) was recorded on treatment four. Mean weight of harvested  
 162 flush decrease with successive generations (Table 6). Besides, the higher ( $26.20 \pm 19$ ) value of overall mean weight of  
 163 individual fruiting body was observed in treatment three.  
 164 **Table 6:** The effect of substrates on Weight (gm)

| Substrate                        | mean $\pm$ SD and 95% CI of Weight for each flush |                                     |                                     | 95% CI for the    | Over all mean       |
|----------------------------------|---------------------------------------------------|-------------------------------------|-------------------------------------|-------------------|---------------------|
|                                  | flush 1                                           | flush 2                             | flush 3                             | Overall mean      | Mean $\pm$ SD       |
| WP (50%) + CS (50%)              | $6.34 \pm 1.44^a$<br>4.54, 8.14                   | $4.94 \pm 1.71^a$<br>2.82, 7.06     | $5.08 \pm 2.31^a$<br>2.21, 7.95     | 4.43, 6.47        | $5.45 \pm 1.84^a$   |
| WP (75%) + CS (25%)              | $34.08 \pm 45.69^a$<br>-22.66, 90.82              | $14.04 \pm 12.38^a$<br>-1.34, 29.42 | $15.36 \pm 4.97^a$<br>9.18, 21.54   | 6.12, 36.19       | $21 \pm 27.15^a$    |
| WP (50%) + CS (25%)<br>+WB (25%) | $33.90 \pm 1.06^a$<br>21.40, 46.39                | $32 \pm 24.92^a$<br>1.05, 62.94     | $12.70 \pm 15.71^a$<br>-6.80, 32.21 | 15.47, 36.93      | $26.20 \pm 19.36^b$ |
| WP 100%                          | $21.16 \pm 11.15^a$<br>7.31, 35.05                | $33.76 \pm 22.47^a$<br>5.85, 61.66  | $14.56 \pm 11.00^a$<br>0.89, 28.22  | 13.85, 32.48      | $23.16 \pm 16.80^a$ |
| WP (75%) + WB (25%)              | $28.20 \pm 7.46^a$<br>18.93, 37.47                | $24.64 \pm 20.16^a$<br>-0.39, 49.67 | $21.38 \pm 13.38^a$<br>4.76, 37.99  | $17.07 \pm 32.40$ | $24.74 \pm 13.84^b$ |
| Control                          | $27.4^a$                                          | $19.7^a$                            | $21.33^a$                           | 12.71, 32.89      | $22.80 \pm 4.06^a$  |

165 **Means followed by different superscript letters within a row and columns are significantly different ( $p < 0.05$  using**  
 166 **Tukes multiple comparisons method), WP= waste paper, CS=Corn stalk, WB= Wheat barn**  
 167 Table 7 indicates the effect of the treatment groups with varying substrate composition on yield (gm) and BE (%). The  
 168 highest total yield (682.1gm) was obtained from control followed by treatment three ( $646.4 \pm 273.1$  gm). Of the 1<sup>st</sup> flush  
 169 cropped, the maximum yield ( $435.86 \pm 133.34$  gm) was recorded on treatment three while the lowest ( $87.4 \pm 48.07$ ) yield  
 170 was obtained from treatment four. On the other hand, in 2<sup>nd</sup> generation flush the mean yield ranged from  $57.40 \pm 15.85$   
 171 (gm) to 232 gm and highest was recorded on cotton husk (control). In the 3<sup>rd</sup> generation flush the minimum ( $34.40 \pm$   
 172  $18.06$ g) total yield was recorded on treatment four. Though, significant ( $p > 0.05$ ) difference was observed only in  
 173 treatment four ignoring the flushes.  
 174 **Table 7:** The effect of substrate on yield (gm) and BE (%)

| Substrate     | Mean±SD and 95% CI of Yield for each flush |                             |                            | Over all | Total Yields                | Biological                  |
|---------------|--------------------------------------------|-----------------------------|----------------------------|----------|-----------------------------|-----------------------------|
|               | flush 1                                    | flush 2                     | flush 3                    | mean     | (gm)                        | Efficiency (BE)             |
| WP (50%) +    | 324.72±1.98 <sup>a</sup>                   | 225 ±23.81 <sup>b</sup>     | 70.28 ±27.28 <sup>c</sup>  | 206.68 ± | 620.04 ± 83.07 <sup>a</sup> | 62.004 ± 83.07              |
| CS (50%) (T1) | 285, 364.44                                | 195.47, 254.61              | 36.40 , 104.15             | 111.39   |                             | <sup>a</sup>                |
| WP (75%) +    | 331 ±33.03 <sup>a</sup>                    | 95.72 ± 37.47               | 57.06 ±34.81 <sup>bc</sup> | 161.26 ± | 483.78 ± 105.31             | 48.44 ± 105.31 <sup>a</sup> |
| CS (25%) (T2) | 289.97 , 372                               | <sup>b</sup>                | 13.84 ,100.28              | 129.46   | <sup>a</sup>                |                             |
| WP (50%)      | 435.86 ±133.3                              | 140.92 ±65 <sup>b</sup>     | 69.62±74.84 <sup>bc</sup>  | 215.46 ± | 646.4 ± 273.1 <sup>a</sup>  | 64.64 ± 273.1 <sup>a</sup>  |
| +CS (25%)     | <sup>a</sup>                               | 60.20, 221.64               | -23.3 , 18.06              | 186.59   |                             |                             |
| WP 100%       | 87.4±48.07 <sup>a</sup>                    | 57.40 ± 15.85 <sup>ab</sup> | 34.40 ±18.06 <sup>bc</sup> | 59.73 ±  | 179.2 ± 81.95 <sup>d</sup>  | 17.92 ± 81.95 <sup>d</sup>  |
|               | 27.71, 147.08                              | 37.72 , 77.08               | 11.97, 56.83               | 36.46    |                             |                             |
| WP(75%) +     | 243.8 ±200.5 <sup>a</sup>                  | 163.8 ±178.47 <sup>a</sup>  | 115.2 ±132.46 <sup>a</sup> | 174.26 ± | 522.8 ± 511.4 <sup>a</sup>  | 52.28 ± 511.4 <sup>a</sup>  |
| WB(25%)       | -5.15, 492.7                               | -57.8, 385.4                | -49.23, 279                | 169.15   |                             |                             |
| Control       | 302.5 <sup>a</sup>                         | 232 <sup>a</sup>            | 147.6 <sup>a</sup>         | 227.36 ± | 682.1 <sup>a</sup>          | 68.21 <sup>a</sup>          |

175 **Means followed by different superscript letters within a row and columns are significantly different (p<0.05 using**  
176 **Tukes multiple comparisons method), WP= waste paper, CS=Corn stalk, WB= Wheat barn, BE=Biological**  
177 **efficiency**

## 178 5. DISCUSSION

179 Mycelial growth provides suitable internal conditions for fruiting. In this study, the fastest mycelia extension was  
180 observed in treatment one (15 days), three, and five equally. Thus, outstanding growth of mycelium is a vital factor in  
181 mushroom cultivation (Pokhrel *et al.*, 2009). In this study, waste paper supplemented with wheat bran and corn stalk  
182 produce mycelium extension within short period of time which is similar with the control except the second treatment  
183 group. However, waste paper without supplementary materials takes relatively rather extended time. This could be due to  
184 the variation in nutrient content, lignin and cellulose composition and moisture holding capacity of the substrate. Similar  
185 results were reported by Shah *et al.*, (2004) where the growth of *Pleurotus* species on wheat straw, rice husk as well as  
186 saw dust took 2-3 weeks for spawn running (mycelial growth) after inoculation. Moreover, Kumari and Achal (2008)  
187 noted that colonization of the substrate with *P.ostreatus* was completed within 20 days of inoculation. Conversely, the  
188 current study contradicts with the results of Zenebe Girmay *et.al* (2016) where they reported that mycelia running in  
189 waste paper took 14 days. The variation in mycelia extension might be due to the difference in condition of the  
190 environment and the nature of the substrate. *P. ostreatus* grew quickly at 30 °C (Marino *et al.*, 2003) and oyster yield  
191 decreases when the temperature decreases in different climatic zones (Zervakis *et al.*, 2001).

192 Sharma *et al* (2013) reported that primordial initiation (pin head formation) on various substrates were in between 26.40-  
193 31.60 days of incubation. Moreover, Shah *et al.* (2004) indicated that relatively higher room temperature could have  
194 resulted in shorter pinning periods (27 to 34 days of incubation). This contradicts with our result where all the treatments  
195 initiate the pin head within few days. Oei (2003) reported that materials with high quality lignin and cellulose contents  
196 take longer time to start pinning compared to the substrates with low contents of the lignin and cellulose. This study  
197 reveals that as the amount of waste paper increases the time taken for pinning increases (**Table 2**). Thus, the longer time  
198 taken for pinning might be due to the cellulose and lignin content of waste paper. Different scholars reported different  
199 pinning days. The variation in pin head formation might be due to the difference in room temperature of the cultivation  
200 room and nutrient availability of the substrate.

201 A number of investigators have reported different timing period for fruiting bodies (maturity). Similar results ( $4 \pm 0.7$   
202 days) for the maturation of fruit bodies were reported by Gume *et al.*, (2013). The current result is inconsistent with  
203 Islam *et al.* (2009) which reported that maturation period of *Pleurotus* species ranging from 3.29 to 4.33 growing on saw  
204 dusts of Mango, Shiris, Jackfruit, Kadom, Jam and Coconut. Moreover, Girmay *et.al* (2016) noted a higher (39) number  
205 of maturation days of *P.ostreatus* mushroom cultivated on waste paper. The variation in maturity of fruiting bodies could  
206 be owing to the difference in physiological requirements and the nature of the substrate.

207 Gume *et al.* (2013) reported shorter (1.4 to 1.9 cm) stalk length and pileus diameter (3.8 to 5.2 cm) than the current  
208 finding on mushrooms grown on sawdust, coffee bean husks, and corncobs. Stipe (stalk) length and pileus diameter of  
209 oyster mushroom grown in different substrates depended on the structure, compactness and physical properties of the  
210 substrate which in turn depend on the type of substrates. The substrates with higher moisture retaining capacity perform  
211 better than those with lower moisture retaining capacity (Chukwurah *et. al.*, 2013). Fruit bodies with larger pileus (caps)  
212 and shorter stipes (stalk) are better than that with smaller pileus and longer stipes (Synytsya *et al.*, 2008). In the current  
213 study, treatment two provides better quality of mushroom with larger pileus diameter and shorter stalk length. However,  
214 the stipes contains more insoluble dietary fibers that can be used for the preparation of biologically active polysaccharide  
215 complexes utilizable as food supplements than pilei. Moreover, Kivaisi *et.al* (2003) indicated that the size of the pileus  
216 depends on the aeration and amount of light.

217 Sarker *et al.* (2007) reported that the individual weight of fruiting body ranged from 1.33-1.59 g, which was less than the  
218 current finding. Similarly Bhuyan (2008) reported less (5.02-7.01 g) result than the current study. Moreover, Bhuyan  
219 (2008) reported a significant effect of supplementation on weight of individual fruiting bodies. The variation in weight of

220 individual fruiting bodies might be due to environmental conditions or growing season and variation in nutrient  
221 composition of the substrates.  
222 Yield among the flushes of each treatment varies significantly ( $P < 0.05$ ) for some of the treatments (**Table 7**). Besides, the  
223 yield of all treatments did not significantly vary. This indicates that waste paper supplemented with corn stalk and wheat  
224 bran could replace cotton husk for cultivation of mushroom. In this research, higher yield were obtained compared to  
225 Sharma *et al* (2013) with 381.85 gm yield of *Pleurotus ostreatus* growing on rice straw, rice straw + wheat straw, rice  
226 straw + paper, sugarcane bagasse and sawdust of alder. Furthermore, the maximum biological efficiency ( $64.64 \pm 273.1$ )  
227 was recorded on treatment three while the lowest ( $17.92 \pm 81.95\%$ ) BE was obtained from treatment four. This is in line  
228 with the works of Holkar and Chandra (2016) where they reported that the biological efficiencies of *P.ostreatus* growing  
229 on wheat straw range from 63.4 to 74. As per Gume *et al.*, (2013), substrates that gave over 40% BE could be  
230 recommended for oyster mushrooms cultivation. Thus, the current study reveals that all the treatments except waste paper  
231 (100%) without supplement gave higher BE (**Table 7**). This could be due to the better availability of nitrogen, carbon  
232 and minerals from the supplements (Shah *et al.*, 2004).

## 233 **6. CONCLUSION**

234 This study clearly indicates that Waste paper supplemented with corn stalk and wheat bran offers higher total yield and  
235 Biological efficiency. It represents promising substrates which can serves as a basal medium for the cultivation of Oyster  
236 mushroom. This biological process revealed that the conversion of waste papers into a biomass of edible mushroom and  
237 pest that can be utilized as a fertilizer. It appears that the lignin, cellulose and hemicellulose, the active components of  
238 paper, provides a carbon sources. Thus, it is ecofriendly approach in terms of solid waste management and is also  
239 economically sound in light of food security.

## 240 **Funding**

241 This work was sponsored by Aksum University, Ethiopia.

## 242 **Conflicts of interest**

243 The authors declare that there is no conflict of interest.

## 244 **REFERENCES**

- 245 1. Banik S & Nandi R. Effect of supplementation of rice straw with biogas residual slurry manure on the yield, protein  
246 and mineral contents of oyster mushroom. *Industrial Crops and Products*. 2004; 20:311-319.
- 247 2. Baysal E., Peker H., Yalinkilic MK., and Temiz A. Cultivation of Oyster Mushroom on waste paper with some added  
248 supplementary material. *Bioresource Technology*. 2003; 89:95-97.

- 249 3. Bhuyan, M.H.M.B.U. Study on Preparation of Low Cost Spawn Packets for the Production of Oyster Mushroom  
250 (*Pleurotus Ostreatus*) and its Proximate Analysis, M.S. Thesis, Department of Biochemistry, SAU, Dhaka. 2008
- 251 4. Chukwurah N. F., Eze S. C., Chiejina N. V.3., Onyeonagu C. C., Okezie C. E. A. Ugwuoke K. I., Ugwu F. S. O.,  
252 Aruah C. B.1, Akobueze E. U., and Nkwonta C. G. Correlation of stipe length, pileus width and stipe girth of oyster  
253 mushroom (*Pleurotus ostreatus*) grown in different farm substrates. 2013
- 254 5. Deepalakshmi K and Mirunalini S. *Pleurotus ostreatus*: an oyster mushroom with nutritional and medicinal properties. J  
255 Biochem Tech.2014; 5:718-726.
- 256 6. Fan L., Pandey A., Mohan R and Soccol C .R. Use of various coffee industry residues for cultivation of *Pleurotus*  
257 *ostreatus* in solid state fermentation. Acta Biotechnol.2000; 20: 41-52.
- 258 7. Gume B., Muleta D., and Abate D. Evaluation of locally available substrates for cultivation of oyster mushroom  
259 (*Pleurotus ostreatus*) in Jimma, Ethiopia. African journal of Microbiology Research.2013; 7: 2228-2237.
- 260 8. Holkar K.S and Chandra R.Comparative evaluation of five *pleurotus species* for their growth behavior and yield  
261 performance using wheat straw as a substrate. Journal of environmental Biology. 2016; 37:7-12.
- 262 9. Iqbal S.M., Rauf C.A and Sheikh M. I. Yield performance of oyster mushroom on different substrate, International  
263 Journal of Agriculture and Biology.2005; 7: 900-903.
- 264 10. Islam M.Z, Rahman M.H and Hafiz F. Cultivation of oyster mushroom (*Pleurotus flabellatus*) on different substrates.  
265 Int. J. Sustain. Crop Prod.2009; 4:45-48.
- 266 11. Khare K.B., Mutuku J.M., Achwania O.S and Otaye D.O. Production of two oyster mushrooms, *Pleurotus sajor-caju*  
267 and *P. florida* on supplemented and un-supplemented substrates, International Journal of Agriculture and Applied  
268 Sciences. 2010; 6: 4-11.
- 269 12. Kivaisi K., F.S.S. Magingo and B. Mamiro. Performance of *P.flabellatus* on water hyacinth shoots at two different  
270 temperature and relative humidity regimes. Tanzania J.Sc. 2003; 29:11-18.
- 271 13. Kumari D and Achal V. Effect of different substrates on the production and nonenzymatic antioxidant activity of  
272 *Pleurotus ostreatus*. Life Sci J. 2008; 5:73-76.
- 273 14. Marino RH, da Eira AF, Kuramae EE and Queiroz EC. Morphomolecular characterization of *Pleurotus ostreatus* (Jacq.  
274 Fr.) kummer strains in relation to luminosity and temperature of frutification. Scientia Agricola, 2003; 60:531-535.
- 275 15. Oei P. Mushroom cultivation-Appropriate Technology for Mushroom Growers. 3<sup>rd</sup> Edn., Backhuys Publishers, Leiden,  
276 Netherlands.2003
- 277 16. Peng J.T., Lee C.M and Tsai, Y.F. Effect of rice Bran on the production of different king oyster mushroom strains  
278 during bottle cultivation. J. Agric. Res. 2000; 49:60-67.

- 279 17.Randive S.D. Cultivation and study of growth of oyster mushroom on different agricultural waste substrate and its  
280 nutrient analysis. *Advances in Applied Science Research*.2012; 3:1938-1949.
- 281 18.Sarker N.C., Hossain M.M., Sultana N., Mian H., Karim A.J.M.S and Amin SMR. Performance of Different Substrates  
282 on the Growth and Yield of *Pleurotus ostreatus* (Jacquin ex Fr.) Kummer, *Bangladesh J. Mushroom*.2007; 1:9-20.
- 283 19.Sa' nchez, C. Cultivation of *Pleurotus ostreatus* and other edible mushrooms. *Appl. Microbiol. Biotechnol.* 2010;  
284 85:1321–1337.
- 285 20.Sharma S., Yadav P.R and Pokhrel P.C. Growth and Yield of Oyster mushroom (*Pleurotus ostreatus*) on different  
286 substrates. *Journal on New Biological Reports*. 2013; 2:3-8.
- 287 21.Shah Z.A., Ashraf M and Ishtiaq M.C. Comparative study on cultivation and yield performance of Oyster mushroom  
288 (*Pleurotus ostreatus*) on different substrates (wheat straw, Leaves and Sawdust). *Pakistan J. Nutrition*. 2004; 3:158-  
289 160.
- 290 22.Synytsya A, Mickova K, Jablonsky I, Slukova M and Copikova J. Mushrooms of genus *Pleurotus* as a source of dietary  
291 fibers and glucans for food supplements. *Czech. J. Food Sci*.2008; 26: 441–446.
- 292 23.Pokhrel CP, Yadav RKP and Ohga S. Effects of physical factors and synthetic media on mycelial growth of  
293 *Lyophyllum decastes*. *Jour Ecobiotech*.2009; 1:46-50.
- 294 24.Zenebe Girmay, Weldesemayat Gorems, Getachew Birhanu and Solomon Zewdie. Growth and yield performance of  
295 *Pleurotus ostreatus* (oyster mushroom) on different substrates. *AMB Express*.2016; 6: 87.
- 296 25.Zervakis G, Philippoussis A, Ioannidou S and Diamantopoulou P. Mycelium growth kinetics and optimal temperature  
297 conditions for the cultivation of edible mushroom species on lignocellulosic substrates. *Folia microbiologica*.2001; 46:  
298 231-4.
- 299
